# Supplementary material for: Novel highly stable β-cyclodextrin fullerene mixed valent Fe-metal framework for quick Fenton degradation of alizarin
Source: Royal Society of Chemistry journal article supplement (doi:10.1039/c7ra06447k), 2017-01-01
Supplement: c7ra06447k1.pdf [file c7ra06447k1.pdf]

Supplementary material

Novel highly stable  $\beta$ -Cyclodextrin Fullerene mixed valent Fe-metal framework for quick Fenton degradation of alizarin

<sup>a</sup>Aniruddha Gogoi, <sup>b</sup>Madhukar Navgire, <sup>a</sup>Kanak Chandra Sarma, <sup>c,d</sup>Parikshit Gogoi\*

<sup>a</sup>Department of Instrumentation & USIC, Gauhati University, Guwahati 781014, Assam, India

<sup>b</sup>Department of Chemistry, Jijamata College of Science & Arts, Bhende, Ahmadnagar, Maharashtra, India

<sup>c</sup>Department of Chemistry, Nowgong College, Nagaon 782001, Assam, India.

<sup>d</sup>School of Chemical and Biomolecular Engineering, Renewable Bioproducts Institute, Georgia Institute of Technology, Atlanta, Georgia, 30318, United States

\*Corresponding Author e-mail: parikk100@gmail.com

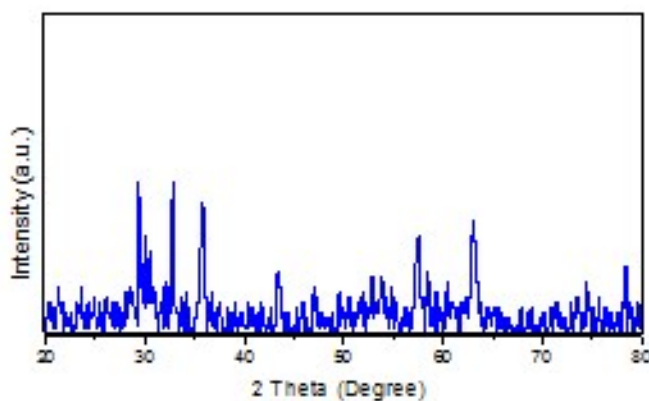

Fig.S1. XRD pattern of Fe<sub>3</sub>O<sub>4</sub> nanoparticle

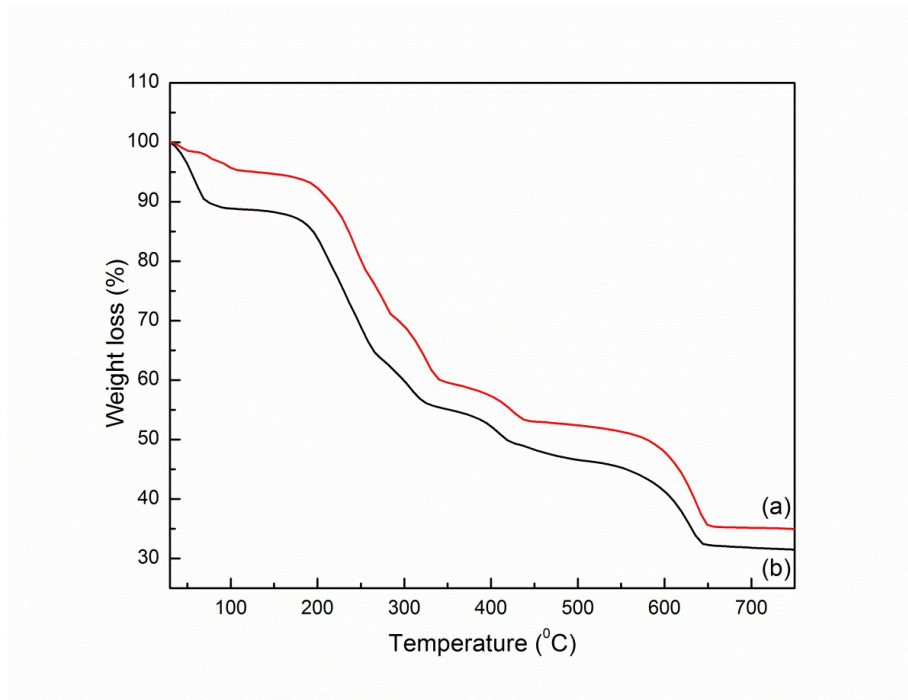

Fig. S2: TGA of (a) Fullerene/  $\text{Fe}_3\text{O}_4$  (FMNPs) and (b)  $\beta$ -CD-Fullerene/  $\text{Fe}_3\text{O}_4$  (CDFMNPs) nanocomposite

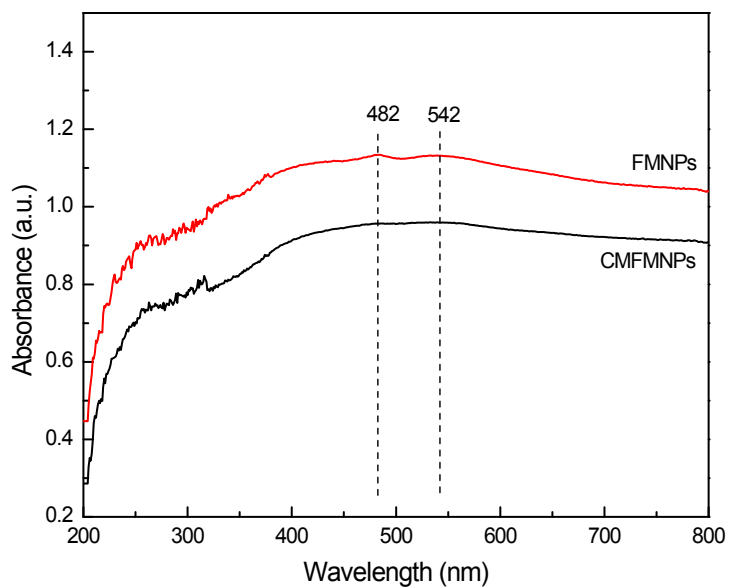

Fig. S3: UV-VIS- DRS study of (a)  $\beta$ -CD-Fullerene/  $\text{Fe}_3\text{O}_4$  (CDFMNPs) and (b) Fullerene/  $\text{Fe}_3\text{O}_4$  (FMNPs) nanocomposite.

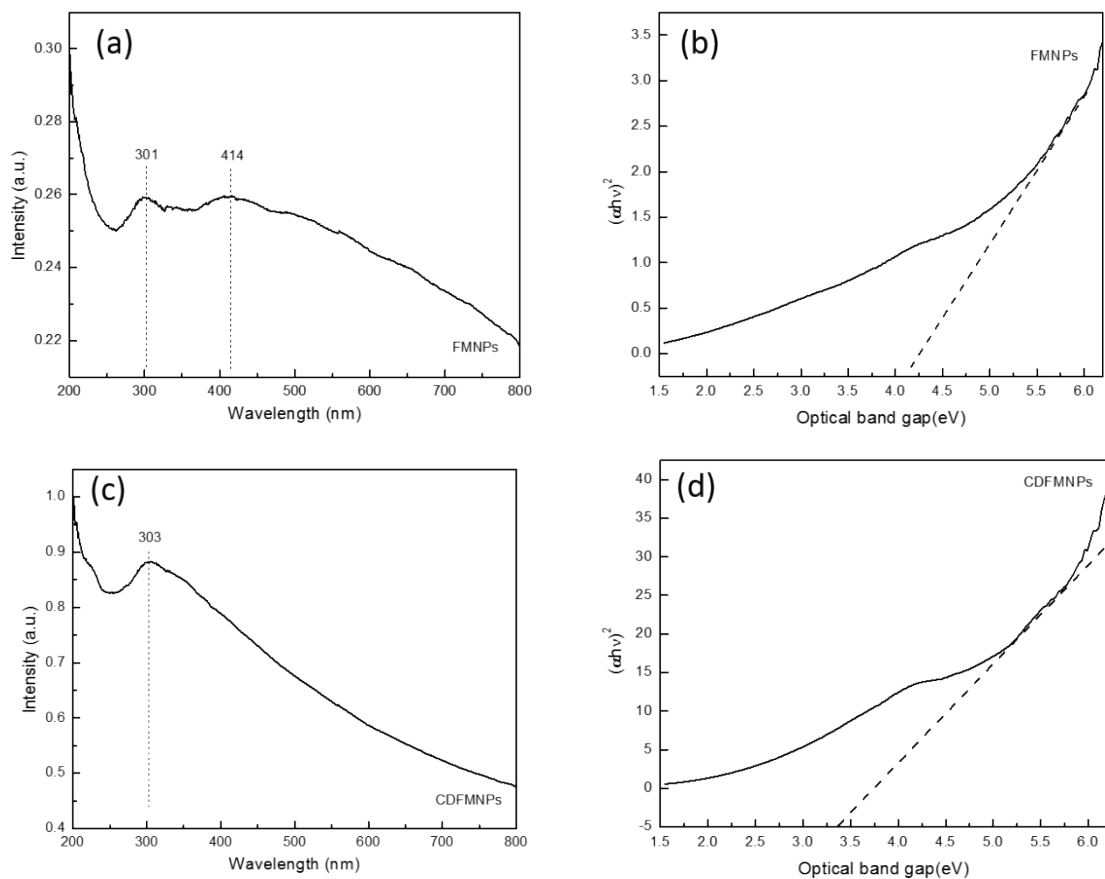

Fig. S4: UV-VIS study of (a)  $\beta$ -CD-Fullerene/  $\text{Fe}_3\text{O}_4$  (CDFMNPs) and (b) Fullerene/  $\text{Fe}_3\text{O}_4$  (FMNPs) nanocomposite. (c) plot of  $(\alpha h\nu)^2$  vs  $h\nu$  for  $\beta$ -CD-Fullerene/  $\text{Fe}_3\text{O}_4$  (CDFMNPs) (d) plot of  $(\alpha h\nu)^2$  vs  $h\nu$  for Fullerene/  $\text{Fe}_3\text{O}_4$  (FMNPs)

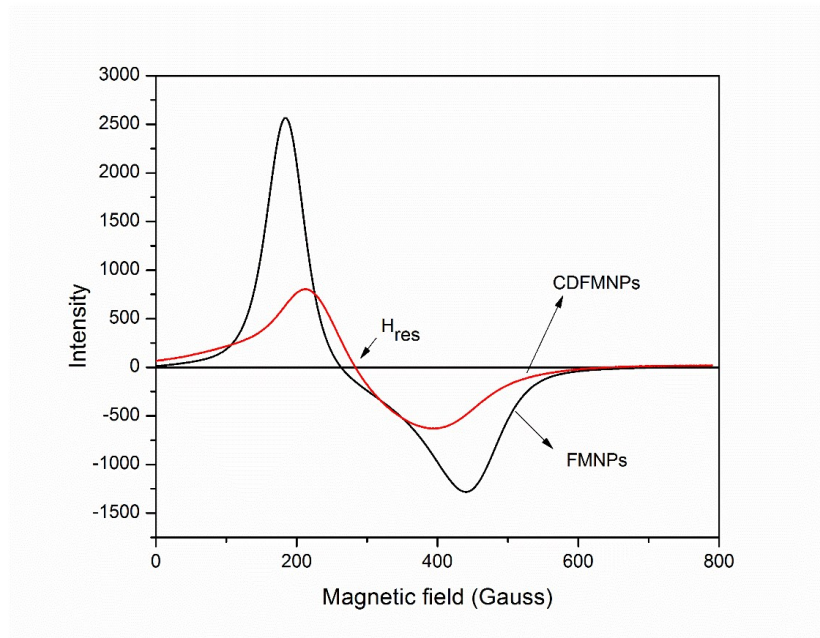

Fig. S5: EPR study of (a)  $\beta$ -CD-Fullerene/  $\text{Fe}_3\text{O}_4$  (CDFMNPs) and (b) Fullerene/  $\text{Fe}_3\text{O}_4$  (FMNPs) nanocomposite.

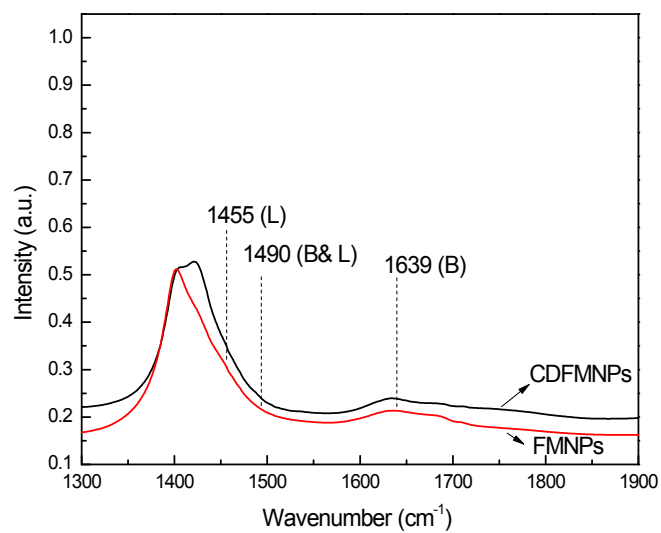

Fig. S6: Pyridine FT-IR study of (a)  $\beta$ -CD-Fullerene/  $\text{Fe}_3\text{O}_4$  (CDFMNPs) and (b) Fullerene/  $\text{Fe}_3\text{O}_4$  (FMNPs) nanocomposite.

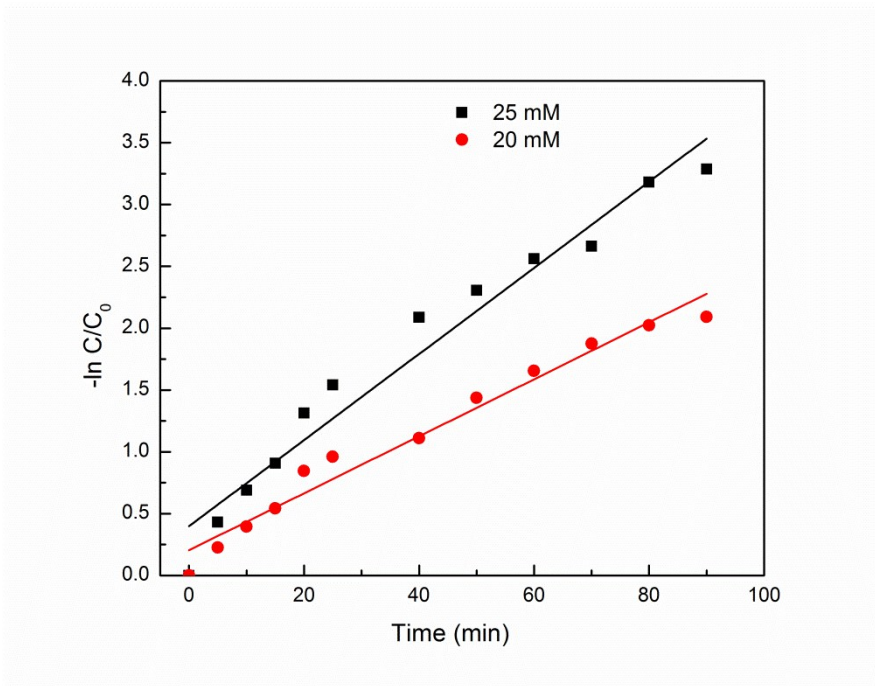

Fig. S7: Effect of H<sub>2</sub>O<sub>2</sub> on rate of alizarin degradation by CDFMNPs, Reaction conditions: Catalyst = 2.0 g/ L, pH= 3, [Alizarin] = 10 mM at room temperature.

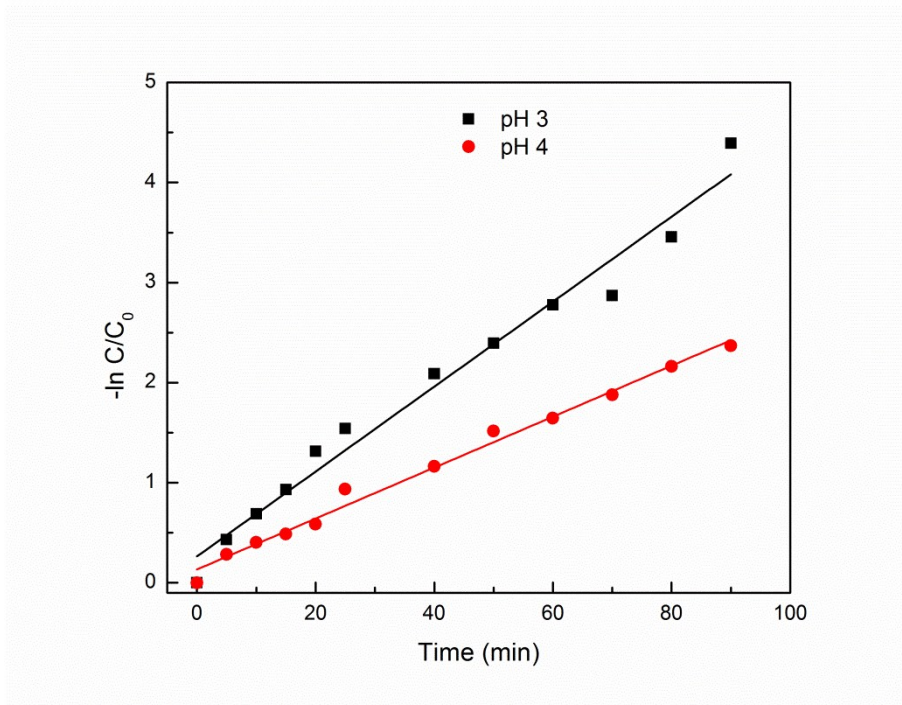

Fig. S8: Effect of pH on rate of alizarin degradation by CDFMNPs, Reaction conditions: [H<sub>2</sub>O<sub>2</sub>] = 25 mM, Catalyst = 2.0 g/ L, [Alizarin] = 10 mM at room temperature.

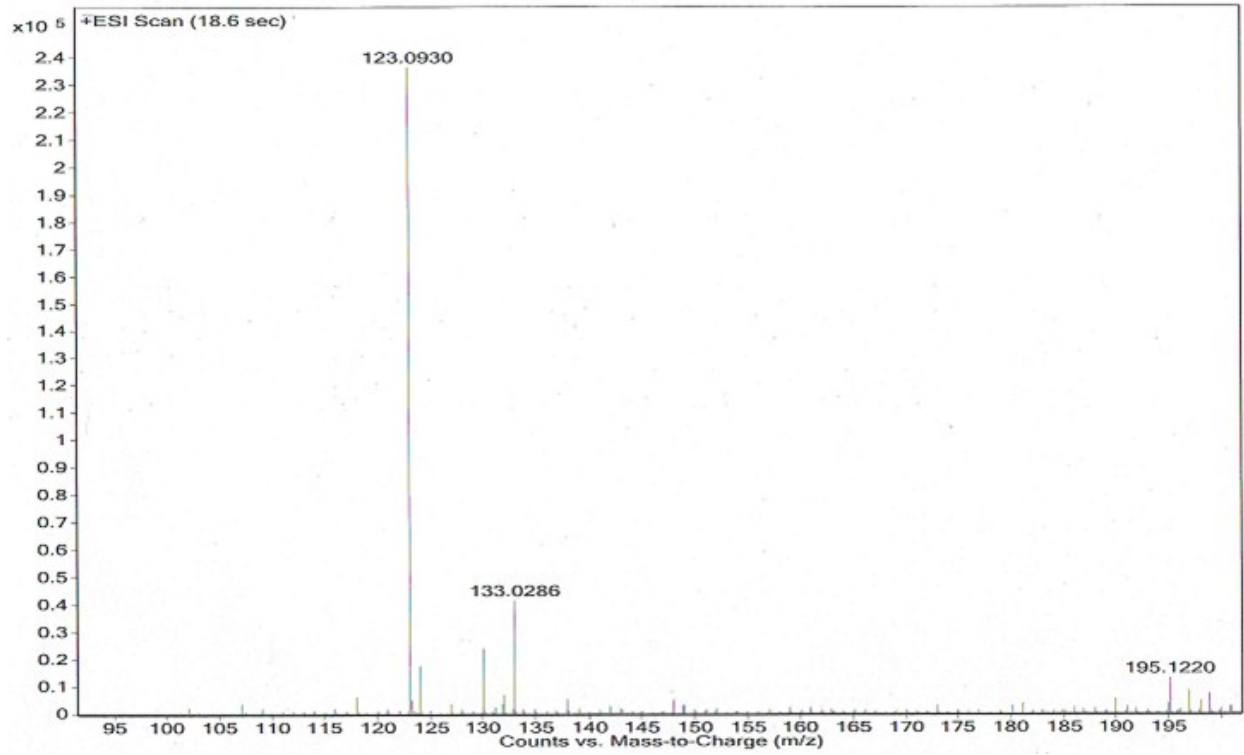

Fig. S9: [ESI (+) ve mode] mass spectra of degraded alizarin by  $\beta$ -CD-Fullerene/  $\text{Fe}_3\text{O}_4$  (CDFMNPs).
